# Supplementary material for: A Genome-Wide Screen for the Exonisation of Reference SINE-VNTR-Alus and Their Expression in CNS Tissues of Individuals with Amyotrophic Lateral Sclerosis
Source: Int J Mol Sci. 2023 Jul 17;24(14):11548. doi: 10.3390/ijms241411548 (PMC10380656; doi:10.3390/ijms241411548)
Supplement: Supplementary file 1 [file ijms-24-11548-s001.zip › Supplementary Tables Pfaff et al.xlsx]

## Sheet: Table S1
Table S1. Gencode transcripts containing SVA sequences.
SVA					Transcript
chr	Start	End	subtype	strand	chr	Start	End	name	strand	geneName	transcriptClass	transcriptType
chr1	32803738	32805295	SVA_B	-	chr1	32775260	32817369	ENST00000676297.1	-	YARS1	coding	nonsense_mediated_decay
chr1	39807598	39808954	SVA_B	+	chr1	39804520	39809450	ENST00000641632.1	+	ENSG00000284719	nonCoding	lncRNA
					chr1	39799432	39809438	ENST00000687094.1	+	ENSG00000284719	nonCoding	lncRNA
					chr1	39799432	39809182	ENST00000685822.1	+	ENSG00000284719	nonCoding	lncRNA
chr1	65630189	65630430	SVA_D	+	chr1	65420651	65630422	ENST00000371059.7	+	LEPR	coding	protein_coding
chr1	111607038	111608897	SVA_D	-	chr1	111599864	111608324	ENST00000441004.5	-	LINC01160	nonCoding	lncRNA
					chr1	111599654	111608318	ENST00000450155.5	-	LINC01160	nonCoding	lncRNA
					chr1	111604379	111608723	ENST00000453988.1	-	LINC01160	nonCoding	lncRNA
chr1	151768666	151770134	SVA_C	-	chr1	151763383	151769501	ENST00000512280.1	-	ENSG00000249602	nonCoding	lncRNA
					chr1	151770106	151790488	ENST00000525790.5	-	TDRKH	coding	nonsense_mediated_decay
chr1	160932604	160934166	SVA_B	+	chr1	160932464	160949922	ENST00000356006.3	+	ENSG00000198358	nonCoding	lncRNA
chr1	161422258	161424316	SVA_D	+	chr1	161399408	161422424	ENST00000636161.1	+	ENSG00000283696	nonCoding	lncRNA
chr1	173612572	173614262	SVA_D	+	chr1	173555250	173612772	ENST00000431459.1	+	ENSG00000238272	nonCoding	lncRNA
chr1	186459287	186459440	SVA_F	+	chr1	186423558	186459751	ENST00000660380.1	+	PDC-AS1	nonCoding	lncRNA
chr1	212190061	212190452	SVA_F	+	chr1	212168206	212190259	ENST00000444750.1	+	ENSG00000229983	nonCoding	lncRNA
chr1	227132115	227133957	SVA_D	+	chr1	227123894	227132394	ENST00000655100.1	+	ENSG00000287532	nonCoding	lncRNA
chr2	3568481	3570040	SVA_D	-	chr2	3568504	3575100	ENST00000656939.1	-	ENSG00000287126	nonCoding	lncRNA
					chr2	3569442	3574830	ENST00000671571.1	-	ENSG00000287126	nonCoding	lncRNA
chr2	15679875	15681222	SVA_D	-	chr2	15668683	15680484	ENST00000431117.1	-	ENSG00000224194	nonCoding	lncRNA
chr2	27358725	27360255	SVA_F	+	chr2	27356245	27360256	ENST00000447070.1	+	ENSG00000234072	nonCoding	lncRNA
chr2	42013729	42015645	SVA_D	-	chr2	42015624	42025302	ENST00000451514.1	-	ENSG00000226398	nonCoding	lncRNA
chr2	65599971	65601858	SVA_D	-	chr2	65589565	65640177	ENST00000420724.1	-	ENSG00000235725	nonCoding	lncRNA
chr2	74123571	74124940	SVA_B	+	chr2	74123964	74135640	ENST00000652224.1	+	ENSG00000217702	nonCoding	lncRNA
chr2	75724557	75725805	SVA_D	+	chr2	75710781	75728123	ENST00000652200.1	+	ENSG00000286045	nonCoding	lncRNA
chr2	169505003	169506468	SVA_D	+	chr2	169479493	169506655	ENST00000295240.8	+	BBS5	coding	protein_coding
					chr2	169479482	169506655	ENST00000392663.6	+	BBS5	coding	protein_coding
chr2	187555850	187557900	SVA_D	+	chr2	187003273	187556288	ENST00000412276.6	+	ENSG00000224063	nonCoding	lncRNA
chr2	191741091	191743406	SVA_D	+	chr2	191733427	191741097	ENST00000673795.2	+	NABP1-OT1	nonCoding	lncRNA
					chr2	191678135	191741097	ENST00000674414.1	+	NABP1	coding	nonsense_mediated_decay
					chr2	191678135	191741097	ENST00000674406.1	+	NABP1	coding	nonsense_mediated_decay
					chr2	191678135	191741097	ENST00000674360.1	+	NABP1	coding	nonsense_mediated_decay
					chr2	191678135	191741097	ENST00000674262.1	+	NABP1	coding	nonsense_mediated_decay
chr2	201165587	201166984	SVA_C	-	chr2	201116163	201176687	ENST00000309955.8	+	CFLAR	coding	protein_coding
					chr2	201166964	201167546	ENST00000434645.1	+	ENSG00000234431	nonCoding	lncRNA
chr2	207609770	207612036	SVA_E	+	chr2	207609114	207625249	ENST00000411432.5	-	METTL21A	coding	protein_coding
chr2	232905075	232907178	SVA_D	+	chr2	232892897	232905849	ENST00000420650.2	-	NGEF	nonCoding	processed_transcript
chr3	9939331	9940783	SVA_D	-	chr3	9934075	9939707	ENST00000683507.1	+	CRELD1	nonCoding	processed_transcript
					chr3	9933858	9939710	ENST00000682355.1	+	CRELD1	nonCoding	processed_transcript
					chr3	9940011	9940957	ENST00000682967.1	+	CRELD1	nonCoding	processed_transcript
					chr3	9934419	9945385	ENST00000683921.1	+	CRELD1	coding	nonsense_mediated_decay
chr3	46493837	46495729	SVA_D	+	chr3	46494610	46500950	ENST00000684260.1	+	RTP3	coding	protein_coding
chr3	50310594	50313013	SVA_D	-	chr3	50299893	50312381	ENST00000320295.12	-	HYAL1	coding	protein_coding
chr3	133784939	133786232	SVA_F	+	chr3	133746392	133796641	ENST00000402696.9	+	TF	coding	protein_coding
chr3	186810865	186812482	SVA_D	-	chr3	186810879	186825521	ENST00000419745.1	-	LINC02043	nonCoding	lncRNA
chr3	196973198	196974344	SVA_D	+	chr3	196973708	196979197	ENST00000650936.1	+	ENSG00000286017	nonCoding	lncRNA
chr4	79244604	79246390	SVA_B	+	chr4	79211680	79245532	ENST00000437737.3	+	LINC01088	nonCoding	lncRNA
chr4	106320747	106322295	SVA_B	+	chr4	106318378	106349142	ENST00000671960.1	+	AIMP1	coding	protein_coding
					chr4	106320281	106349208	ENST00000673381.2	+	AIMP1	nonCoding	processed_transcript
					chr4	106320476	106347711	ENST00000673018.1	+	AIMP1	coding	protein_coding
					chr4	106316551	106348374	ENST00000671868.1	+	AIMP1	coding	protein_coding
					chr4	106316577	106348077	ENST00000672911.1	+	AIMP1	coding	protein_coding
					chr4	106316549	106347704	ENST00000672337.1	+	AIMP1	coding	protein_coding
chr4	157635820	157638045	SVA_F1	-	chr4	157637686	157667044	ENST00000507296.1	+	ENSG00000249275	nonCoding	lncRNA
chr5	43510426	43512046	SVA_C	+	chr5	43511057	43521811	ENST00000512498.1	+	C5orf34-AS1	nonCoding	lncRNA
chr5	43521478	43523079	SVA_D	+	chr5	43511057	43521811	ENST00000512498.1	+	C5orf34-AS1	nonCoding	lncRNA
chr5	43577581	43579157	SVA_D	-	chr5	43577641	43603063	ENST00000606697.5	-	NNT-AS1	nonCoding	lncRNA
					chr5	43578268	43602965	ENST00000503484.6	-	NNT-AS1	nonCoding	lncRNA
					chr5	43579129	43603063	ENST00000500258.2	-	NNT-AS1	nonCoding	lncRNA
chr5	45889942	45891627	SVA_C	+	chr5	45890215	45895970	ENST00000510987.1	+	ENSG00000250122	nonCoding	lncRNA
chr5	55695269	55697281	SVA_D	-	chr5	55695991	55773194	ENST00000504880.5	-	SLC38A9	nonCoding	processed_transcript
chr5	75610835	75611347	SVA_A	-	chr5	75611181	75671846	ENST00000672850.1	+	ANKDD1B	coding	protein_coding
					chr5	75611201	75671844	ENST00000672844.1	+	ANKDD1B	coding	protein_coding
chr5	118281980	118283577	SVA_C	+	chr5	118282574	118284782	ENST00000503877.1	+	LINC02148	nonCoding	lncRNA
chr5	179834430	179835696	SVA_D	-	chr5	179835132	179858860	ENST00000522663.5	-	MRNIP	coding	nonsense_mediated_decay
chr6	31931262	31933153	SVA_D	-	chr6	31932347	31934282	ENST00000494905.1	+	C2	coding	protein_coding
chr6	43424611	43425988	SVA_C	+	chr6	43370025	43425283	ENST00000657856.1	+	ENSG00000287055	nonCoding	lncRNA
chr7	13101917	13103665	SVA_D	+	chr7	13101390	13102389	ENST00000443947.1	+	ENSG00000229618	nonCoding	lncRNA
chr7	50458899	50461065	SVA_D	+	chr7	50458441	50459684	ENST00000495320.1	-	DDC	nonCoding	processed_transcript
chr7	66392677	66395116	SVA_E	-	chr7	66390130	66393729	ENST00000416366.1	-	LINC00174	nonCoding	lncRNA
chr7	101091762	101093354	SVA_C	+	chr7	101085480	101097967	ENST00000306085.11	+	TRIM56	coding	protein_coding
chr7	155366080	155368468	SVA_E	-	chr7	155356984	155367934	ENST00000378120.5	-	BLACE	nonCoding	lncRNA
chr8	9153368	9154905	SVA_F	-	chr8	9151741	9156363	ENST00000518496.5	+	ENSG00000248538	nonCoding	lncRNA
chr8	43178617	43181231	SVA_E	-	chr8	43180288	43200555	ENST00000521576.1	+	HGSNAT	coding	protein_coding
chr8	86693413	86695342	SVA_D	-	chr8	86668163	86694069	ENST00000680314.1	-	CNGB3	nonCoding	processed_transcript
chr8	93832704	93835304	SVA_A	-	chr8	93834453	93846743	ENST00000520962.1	-	ENSG00000254057	nonCoding	lncRNA
chr8	116296997	116298382	SVA_B	+	chr8	116289621	116298954	ENST00000669902.1	+	ENSG00000287826	nonCoding	lncRNA
chr9	6622240	6623631	SVA_D	+	chr9	6605275	6623002	ENST00000639840.1	-	GLDC	coding	protein_coding
					chr9	6610255	6623082	ENST00000639020.1	-	GLDC	coding	protein_coding
chr9	83272061	83273626	SVA_C	+	chr9	83272279	83276864	ENST00000649946.1	+	ENSG00000237529	nonCoding	lncRNA
chrX	134838635	134840373	SVA_D	+	chrX	134807260	134854803	ENST00000642481.1	+	PABIR3	coding	nonsense_mediated_decay
					chrX	134807258	134854515	ENST00000645176.1	+	PABIR3	coding	nonsense_mediated_decay
					chrX	134807190	134854517	ENST00000644752.1	+	PABIR3	coding	nonsense_mediated_decay
					chrX	134839172	134854183	ENST00000460216.5	+	PABIR3	nonCoding	processed_transcript
chr10	49969751	49971348	SVA_C	+	chr10	49942080	49973181	ENST00000483296.5	+	TIMM23B	nonCoding	processed_transcript
					chr10	49818278	49970203	ENST00000402038.7	-	PARG	coding	protein_coding
chr10	59743664	59745122	SVA_B	+	chr10	59737197	59744244	ENST00000602051.5	-	MRLN	coding	protein_coding
					chr10	59737197	59744864	ENST00000599605.1	-	MRLN	coding	protein_coding
chr11	516847	518179	SVA_A	+	chr11	512512	518134	ENST00000670787.1	+	ENSG00000288033	nonCoding	lncRNA
chr11	4136771	4138113	SVA_D	-	chr11	4137115	4138257	ENST00000529323.1	-	RRM1-AS1	nonCoding	lncRNA
chr11	8977335	8979521	SVA_E	+	chr11	8965047	8977472	ENST00000532599.5	+	TMEM9B-AS1	nonCoding	lncRNA
					chr11	8966579	8977527	ENST00000534349.1	+	TMEM9B-AS1	nonCoding	lncRNA
chr11	18120428	18122018	SVA_D	+	chr11	18120954	18138480	ENST00000396275.2	+	MRGPRX3	coding	protein_coding
chr11	46585056	46585385	SVA_D	+	chr11	46572947	46587808	ENST00000648317.1	+	ENSG00000285658	nonCoding	lncRNA
chr11	60200312	60201870	SVA_D	-	chr11	60200269	60243137	ENST00000651255.1	-	MS4A4E	coding	protein_coding
					chr11	60201252	60243088	ENST00000532442.5	-	MS4A4E	coding	nonsense_mediated_decay
chr11	74128567	74130171	SVA_D	-	chr11	74128053	74171002	ENST00000680718.1	-	C2CD3	coding	protein_coding
					chr11	74128577	74171000	ENST00000539061.6	-	C2CD3	coding	protein_coding
chr11	75876849	75878937	SVA_D	-	chr11	75878403	75961549	ENST00000528264.1	+	UVRAG	coding	protein_coding
chr11	79190769	79192767	SVA_D	+	chr11	79191557	79193160	ENST00000527440.1	+	ENSG00000254885	nonCoding	lncRNA
chr11	95481758	95483422	SVA_D	+	chr11	95482405	95497553	ENST00000511947.2	+	ENSG00000250390	nonCoding	lncRNA
chr12	4689299	4689938	SVA_C	-	chr12	4649113	4694317	ENST00000266544.10	+	NDUFA9	coding	protein_coding
chr12	9952120	9954225	SVA_F	+	chr12	9948136	9953336	ENST00000420905.1	-	CLEC12A-AS1	nonCoding	lncRNA
chr12	42349412	42351031	SVA_B	-	chr12	42350202	42387522	ENST00000552794.1	+	PPHLN1	nonCoding	processed_transcript
chr12	48499731	48501554	SVA_D	-	chr12	48483286	48500961	ENST00000551847.1	-	ENSG00000258121	nonCoding	lncRNA
chr12	49860208	49861980	SVA_D	+	chr12	49861206	49865802	ENST00000547902.2	+	ENSG00000257253	nonCoding	lncRNA
chr12	55478463	55480124	SVA_D	-	chr12	55434733	55479472	ENST00000555146.5	-	ENSG00000258763	nonCoding	lncRNA
chr12	66133921	66136081	SVA_F	+	chr12	66130750	66134449	ENST00000510317.2	+	LLPH-DT	nonCoding	lncRNA
					chr12	66135845	66169996	ENST00000358230.8	-	TMBIM4	coding	protein_coding
chr12	70201095	70203782	SVA_E	+	chr12	70180337	70202004	ENST00000552324.1	+	LINC02821	nonCoding	lncRNA
chr12	95946578	95949150	SVA_F	+	chr12	95947055	95956696	ENST00000553023.1	+	AMDHD1	coding	protein_coding
chr12	110949939	110951967	SVA_D	-	chr12	110951682	110957812	ENST00000546852.5	-	ENSG00000258240	nonCoding	lncRNA
					chr12	110951710	110957811	ENST00000548329.1	-	ENSG00000258240	nonCoding	lncRNA
chr13	22858409	22859985	SVA_D	-	chr13	22859049	22915775	ENST00000668623.1	-	LINC00621	nonCoding	lncRNA
					chr13	22859273	22915767	ENST00000663150.1	-	LINC00621	nonCoding	lncRNA
chr13	41571267	41572810	SVA_B	+	chr13	41547947	41590462	ENST00000674416.1	+	ENSG00000288598	nonCoding	lncRNA
chr13	52063026	52065140	SVA_D	+	chr13	52064755	52129078	ENST00000355568.8	-	NEK5	coding	protein_coding
chr13	73574222	73576214	SVA_F1	+	chr13	73545905	73574260	ENST00000649507.2	-	LINC00393	nonCoding	lncRNA
					chr13	73545900	73574295	ENST00000649254.1	-	LINC00393	nonCoding	lncRNA
					chr13	73574295	73588070	ENST00000660666.1	+	LINC00392	nonCoding	lncRNA
					chr13	73574512	73588070	ENST00000666930.1	+	LINC00392	nonCoding	lncRNA
chr13	109310877	109312397	SVA_B	+	chr13	109310134	109311773	ENST00000432575.1	+	LINC01067	nonCoding	lncRNA
chr14	20505263	20507610	SVA_D	+	chr14	20505536	20511155	ENST00000430083.1	+	RNASE10	coding	protein_coding
chr14	35823971	35825640	SVA_D	-	chr14	35819223	35826765	ENST00000555918.1	-	ENSG00000258938	nonCoding	lncRNA
chr14	37554651	37556547	SVA_D	-	chr14	37556157	37567095	ENST00000556024.1	-	ENSG00000259087	nonCoding	lncRNA
					chr14	37556157	37559484	ENST00000553425.5	-	ENSG00000259087	nonCoding	lncRNA
chr14	45388991	45390849	SVA_F	+	chr14	45377267	45389286	ENST00000546784.2	+	ENSG00000257900	nonCoding	lncRNA
chr14	50956281	50957314	SVA_B	-	chr14	50956258	50962002	ENST00000553648.2	-	ENSG00000258711	nonCoding	lncRNA
chr14	55455711	55457032	SVA_D	-	chr14	55436897	55456726	ENST00000556755.1	-	TBPL2	coding	protein_coding
chr15	39893097	39895313	SVA_F	-	chr15	39801823	39894527	ENST00000560729.1	-	GPR176	nonCoding	processed_transcript
chr15	41320256	41321987	SVA_D	+	chr15	41320793	41381021	ENST00000668273.1	+	NUSAP1	coding	protein_coding
chr15	51293534	51294998	SVA_D	+	chr15	51037487	51293912	ENST00000559909.1	+	MIR4713HG	nonCoding	lncRNA
chr15	62689894	62691078	SVA_D	-	chr15	62682915	62690448	ENST00000559589.1	-	ENSG00000259756	nonCoding	lncRNA
chr15	63098255	63099785	SVA_D	+	chr15	63098869	63110403	ENST00000560238.1	+	ENSG00000259672	nonCoding	lncRNA
					chr15	63098978	63110588	ENST00000656894.1	+	ENSG00000259672	nonCoding	lncRNA
chr15	82997221	82999196	SVA_F	-	chr15	82994816	83011639	ENST00000304177.10	-	C15orf40	coding	protein_coding
chr16	48416182	48417642	SVA_B	-	chr16	48387197	48417319	ENST00000567973.1	-	SIAH1	nonCoding	processed_transcript
chr16	56738957	56741031	SVA_F	-	chr16	56740713	56805552	ENST00000562496.5	+	NUP93	coding	protein_coding
chr17	8373140	8374641	SVA_B	+	chr17	8365562	8373816	ENST00000583963.1	+	ENSG00000265749	nonCoding	lncRNA
chr17	16311458	16312957	SVA_C	-	chr17	16312386	16317819	ENST00000580201.1	+	PIGL	nonCoding	processed_transcript
chr17	19684810	19685794	SVA_A	+	chr17	19649080	19685700	ENST00000672567.1	+	ALDH3A2	coding	protein_coding
					chr17	19648780	19685700	ENST00000671878.1	+	ALDH3A2	coding	protein_coding
					chr17	19648173	19685760	ENST00000672465.1	+	ALDH3A2	coding	protein_coding
chr17	28223041	28225300	SVA_F	+	chr17	28204615	28223735	ENST00000658960.1	+	ENSG00000287721	nonCoding	lncRNA
chr17	28455404	28456477	SVA_F	-	chr17	28455751	28614183	ENST00000481916.6	-	ENSG00000258472	coding	nonsense_mediated_decay
chr17	28603476	28605357	SVA_D	-	chr17	28603469	28614197	ENST00000584196.1	-	RSKR	coding	nonsense_mediated_decay
					chr17	28601826	28614185	ENST00000577790.2	-	RSKR	coding	nonsense_mediated_decay
chr17	30522805	30524224	SVA_D	+	chr17	30477407	30527592	ENST00000451249.7	+	GOSR1	coding	protein_coding
					chr17	30477361	30527592	ENST00000225724.9	+	GOSR1	coding	protein_coding
chr17	43159301	43159859	SVA_F	-	chr17	43148367	43170316	ENST00000635600.1	-	ENSG00000267002	nonCoding	lncRNA
					chr17	43148704	43160009	ENST00000659136.1	-	ENSG00000267002	nonCoding	lncRNA
chr17	58208666	58209252	SVA_A	-	chr17	58208653	58219255	ENST00000581761.6	-	MKS1	coding	protein_coding
					chr17	58208967	58219255	ENST00000677546.1	-	MKS1	coding	nonsense_mediated_decay
chr17	60550728	60552892	SVA_F1	+	chr17	60526298	60550798	ENST00000558027.1	+	APPBP2-DT	nonCoding	lncRNA
					chr17	60526292	60550766	ENST00000559739.1	+	APPBP2-DT	nonCoding	lncRNA
chr17	63455795	63457690	SVA_D	+	chr17	63454992	63455817	ENST00000582741.1	+	ENSG00000265971	nonCoding	lncRNA
chr17	69195559	69197048	SVA_B	-	chr17	69148591	69225442	ENST00000518929.5	-	ABCA10	coding	nonsense_mediated_decay
					chr17	69148007	69228655	ENST00000522406.5	-	ABCA10	coding	nonsense_mediated_decay
chr17	82376813	82377480	SVA_D	+	chr17	82371764	82377458	ENST00000313135.5	+	UTS2R	coding	protein_coding
chr17	82453200	82454457	SVA_A	-	chr17	82454139	82458207	ENST00000653651.1	-	NARF-AS2	nonCoding	lncRNA
					chr17	82454272	82458521	ENST00000579095.1	-	NARF-AS2	nonCoding	lncRNA
chr18	14222333	14225649	SVA_A	+	chr18	14225223	14342505	ENST00000577614.2	+	ENSG00000283294	nonCoding	lncRNA
chr18	21591666	21593631	SVA_D	-	chr18	21593042	21600704	ENST00000580101.1	-	ESCO1	nonCoding	processed_transcript
chr18	47827452	47828948	SVA_B	+	chr18	47808956	47930659	ENST00000262160.11	-	SMAD2	coding	protein_coding
chr19	20148767	20150775	SVA_F1	-	chr19	20125376	20150548	ENST00000590606.5	-	ENSG00000267383	nonCoding	lncRNA
chr19	20175331	20176841	SVA_D	-	chr19	20176099	20238460	ENST00000585498.1	-	ENSG00000267383	nonCoding	lncRNA
chr19	21442981	21444414	SVA_B	-	chr19	21444240	21463908	ENST00000596705.5	-	ENSG00000268119	nonCoding	lncRNA
chr19	23532836	23534388	SVA_C	-	chr19	23534179	23687212	ENST00000600313.5	-	ZNF675	coding	protein_coding
chr19	36490462	36492158	SVA_D	+	chr19	36489648	36491040	ENST00000592087.1	+	ZNF566-AS1	nonCoding	lncRNA
chr19	52592779	52594354	SVA_D	-	chr19	52594059	52660844	ENST00000600714.5	-	ZNF83	coding	protein_coding
					chr19	52594150	52690496	ENST00000601257.5	-	ZNF83	coding	protein_coding
chr19	52719769	52721743	SVA_A	-	chr19	52720908	52735038	ENST00000601447.5	-	ZNF611	nonCoding	processed_transcript
					chr19	52721152	52735073	ENST00000597566.5	-	ZNF611	nonCoding	processed_transcript
					chr19	52721182	52735015	ENST00000599798.1	-	ZNF611	nonCoding	processed_transcript
chr19	53269385	53270770	SVA_D	-	chr19	53267869	53270932	ENST00000599803.1	-	ENSG00000269758	nonCoding	lncRNA
chr19	57482439	57483853	SVA_D	+	chr19	57477648	57482996	ENST00000595422.1	+	ENSG00000268266	nonCoding	lncRNA
chr19	58404232	58406386	SVA_D	-	chr19	58404237	58407296	ENST00000593393.1	-	ENSG00000232098	nonCoding	lncRNA
					chr19	58404719	58405362	ENST00000444227.2	-	ENSG00000232098	nonCoding	lncRNA
chr20	34131790	34133679	SVA_D	+	chr20	34132269	34136485	ENST00000671505.1	+	ENSG00000287853	nonCoding	lncRNA
chr20	38378086	38379946	SVA_D	+	chr20	38378824	38383179	ENST00000615228.1	+	ENSG00000275285	nonCoding	lncRNA
SVAs that were detected as polymoprhic in ALS consortium cohort

## Sheet: Table S2
Table S2. Novel exonisation events involving SVAs in the motor cortices of 10 individuals.
chr	start	end	subtype	strand	gene	number of samples
chr1	6304393	6306236	SVA_D	-	ACOT7	1
chr1	24832277	24834999	SVA_E	-	CLIC4	2
chr1	25603228	25604942	SVA_D	+	MAN1C1	2
chr1	39233786	39235428	SVA_F	-	ENSG00000287422	1
chr1	46240210	46242951	SVA_F1	+	RAD54L	1
chr1	54232586	54234364	SVA_F	+	SSBP3	1
chr1	161280846	161282441	SVA_D	-	MPZ	6
chr1	172571122	172572716	SVA_D	+	SUCO	1
chr2	32868130	32870552	SVA_F	+	LINC00486	1
chr2	37976852	37978351	SVA_B	-	RMDN2-AS1	1
chr2	50827624	50829294	SVA_D	-	NRXN1	1
chr2	54485149	54486734	SVA_D	+	SPTBN1	10
chr2	86548187	86550464	SVA_A	-	CHMP3	1
chr2	127786853	127789665	SVA_F	-	WDR33	1
chr2	135105178	135106773	SVA_C	+	RAB3GAP1	2
chr2	158309920	158311529	SVA_B	-	CCDC148	7
chr2	171865852	171867661	SVA_D	-	SLC25A12	10
chr2	172699760	172701062	SVA_B	-	RAPGEF4-AS1	1
chr3	51248293	51250286	SVA_D	+	DOCK3	3
chr3	58289233	58291423	SVA_D	-	ABHD6	1
chr3	94043534	94045460	SVA_A	+	ARL13B	1
chr3	113458162	113459428	SVA_B	+	SPICE1	6
chr3	128772721	128774095	SVA_C	+	RAB7A	3
chr3	130867297	130869442	SVA_E	+	ATP2C1	1
chr4	15790105	15792441	SVA_E	+	CD38	1
chr4	53255181	53256942	SVA_D	-	SCFD2	3
chr4	86995262	86996721	SVA_D	+	AFF1	4
chr4	109603110	109604400	SVA_B	+	MCUB	1
chr4	128082813	128084660	SVA_D	-	LARP1B	1
chr4	151167673	151167921	SVA_F	+	SH3D19	5
chr4	158881408	158883015	SVA_C	+	FNIP2	2
chr5	32039088	32041847	SVA_A	+	PDZD2	1
chr5	37518686	37519737	SVA_A	-	WDR70	1
chr5	109340617	109343277	SVA_F	+	PJA2	1
chr5	138810553	138811964	SVA_D	-	CTNNA1	1
chr6	35383322	35385654	SVA_F	+	PPARD	6
chr6	75440987	75442779	SVA_D	-	FILIP1	2
chr7	1145479	1148014	SVA_E	-	ZFAND2A	1
chr7	23635860	23638734	SVA_E	+	CCDC126	3
chr7	92026304	92028308	SVA_A	+	AKAP9	2
chr7	97160024	97160611	SVA_A	+	SDHAF3	4
chr7	128462862	128464284	SVA_B	+	HILPDA-AS1	10
chr8	65662054	65663547	SVA_D	+	MTFR1	7
chr9	5432484	5435334	SVA_A	+	PLGRKT	1
chr9	6806881	6808710	SVA_F	+	KDM4C	2
chr9	33600214	33601837	SVA_D	+	CYP4F26P	1
chr9	111639901	111642603	SVA_F	+	DNAJC25	1
chr9	125458215	125459873	SVA_D	-	MAPKAP1	1
chrX	54128476	54130160	SVA_D	-	FAM120C	1
chrX	55747814	55750067	SVA_D	+	RRAGB	6
chrX	65391724	65393265	SVA_B	+	ZC3H12B	5
chr10	43464382	43466181	SVA_D	-	ZNF487	1
chr10	69992073	69993910	SVA_E	-	LINC02636	1
chr10	92974544	92976669	SVA_D	+	EXOC6	1
chr10	97840961	97842465	SVA_D	+	GOLGA7B	3
chr10	98151907	98153628	SVA_C	+	R3HCC1L	1
chr11	28429350	28431801	SVA_F	+	METTL15	1
chr11	57715581	57717755	SVA_D	-	TMX2	1
chr11	86878207	86880459	SVA_D	+	PRSS23	4
chr12	32562414	32564064	SVA_D	-	FGD4	1
chr12	48915110	48916658	SVA_D	-	ENSG00000272822	5
chr12	51644511	51645965	SVA_D	+	SCN8A	2
chr12	57494506	57496031	SVA_B	-	MARS1	1
chr12	66160759	66161096	SVA_F	-	TMBIM4	1
chr12	110172342	110173981	SVA_D	+	IFT81	1
chr12	111506619	111508170	SVA_D	+	ATXN2	1
chr12	121992948	121994977	SVA_F	+	CFAP251	4
chr12	131925744	131927117	SVA_D	-	ENSG00000255992	3
chr13	32715624	32717706	SVA_D	+	PDS5B	2
chr13	41881386	41882843	SVA_D	-	VWA8	3
chr13	95927670	95929199	SVA_B	-	UGGT2	7
chr14	31436758	31438240	SVA_D	-	ENSG00000203546	2
chr14	64037133	64038888	SVA_D	-	SYNE2	1
chr14	65632981	65634580	SVA_D	+	FUT8	9
chr15	43166554	43168218	SVA_D	-	ENSG00000285080	1
chr15	52459161	52460680	SVA_B	-	MYO5A	10
chr17	1246523	1247952	SVA_D	-	ENSG00000262213	1
chr17	17911651	17913279	SVA_D	-	TOM1L2	2
chr17	28658256	28660271	SVA_B	-	SDF2	4
chr17	32178199	32180647	SVA_A	+	RHOT1	1
chr17	47397008	47398850	SVA_D	+	EFCAB13	3
chr17	47419912	47421644	SVA_D	+	EFCAB13	1
chr18	12873245	12875326	SVA_D	+	PTPN2	1
chr18	79072148	79073684	SVA_B	-	ATP9B	1
chr19	20529100	20531282	SVA_D	-	ZNF737	7
chr19	21510575	21512108	SVA_D	-	ZNF429	1
chr19	23936774	23937864	SVA_D	-	ZNF487	1
chr20	3124215	3126524	SVA_A	+	UBOX5	2
chr20	8643742	8645322	SVA_D	+	PLCB1	1
chr20	33535670	33537533	SVA_D	-	CBFA2T2	1
chr20	41554408	41556322	SVA_D	-	CHD6	4
chr21	45267987	45269807	SVA_F	+	POFUT2	2
SVAs that were detected as polymoprhic in ALS consortium cohort

## Sheet:  Table S3
Table S3. Results of association analysis of 65 SVAs with ALS.
chr	start	end	ID	Minor Allele	Minor allele frequency affected	Minor allele frequency unaffected	unadjusted pvalue	bonferrroni adjusted p value	OR	LCI 95%	UCI 95%
chr1	113068718	113071155	SVA_3	A	0.3778	0.3975	0.6949	1	0.9643	0.804	1.156
chr1	212297812	212299275	SVA_7	P	0.3916	0.4053	0.4078	1	0.9264	0.773	1.11
chr1	248676247	248677600	SVA_8	A	0.1162	0.1134	0.7491	1	0.9575	0.7335	1.25
chr2	41746018	41748726	SVA_9	P	0.3173	0.2997	0.3419	1	1.097	0.906	1.329
chr2	48554714	48557729	SVA_10	A	0.3186	0.3053	0.7623	1	1.029	0.8549	1.239
chr2	113393766	113396035	SVA_11	P	0.4779	0.4937	0.9462	1	1.006	0.8422	1.202
chr2	201281925	201284718	SVA_13	P	0.4825	0.5	0.15	1	0.8565	0.6937	1.058
chr2	207609772	207612061	SVA_14	P	0.1832	0.1817	0.7556	1	1.037	0.8243	1.305
chr2	216225221	216227776	SVA_15	P	0.1198	0.1149	0.4427	1	1.115	0.8439	1.474
chr2	222895474	222897954	SVA_16	P	0.2242	0.2391	0.4524	1	0.9234	0.7502	1.137
chr3	133784939	133786238	SVA_20	A	0.3338	0.2904	0.01789	1	1.27	1.042	1.547
chr3	194400435	194401193	SVA_21	A	0.2454	0.2283	0.1986	1	1.148	0.93	1.418
chr4	63917881	63918835	SVA_22	P	0.3437	0.3349	0.5346	1	1.061	0.8796	1.281
chr4	183734684	183737817	SVA_23	A	0.2188	0.2087	0.9887	1	0.9984	0.8046	1.239
chr5	137686890	137688198	SVA_25	P	0.2381	0.2189	0.123	1	1.181	0.956	1.459
chr5	176960578	176963180	SVA_26	A	0.4938	0.4876	0.4168	1	1.076	0.9021	1.282
chr6	5037016	5038953	SVA_27	P	0.2196	0.1879	0.2394	1	1.145	0.9139	1.434
chr6	29932007	29933750	SVA_28	P	0.2403	0.2893	0.007764	0.5046	0.7837	0.6549	0.9377
chr6	31243855	31245340	SVA_29	P	0.144	0.1677	0.06874	1	0.8037	0.6352	1.017
chr6	31453720	31456610	SVA_30	P	0.4895	0.5047	0.5022	1	0.9412	0.7885	1.123
chr6	32594189	32596832	SVA_31	P	0.1701	0.1708	0.5859	1	1.068	0.8427	1.354
chr6	33058953	33060876	SVA_32	A	0.1605	0.1503	0.6479	1	1.062	0.8206	1.374
chr6	56893566	56896149	SVA_34	A	0.2503	0.2547	0.4926	1	0.9319	0.7619	1.14
chr6	125387620	125390207	SVA_37	A	0.3183	0.3078	0.7699	1	1.029	0.8497	1.246
chr6	158127251	158128035	SVA_38	P	0.1383	0.1475	0.8659	1	0.9787	0.7622	1.257
chr7	1145445	1148019	SVA_39	P	0.3673	0.3944	0.3423	1	0.916	0.7643	1.098
chr7	10464690	10466507	SVA_40	A	0.3281	0.3152	0.7174	1	1.035	0.8585	1.248
chr7	55219066	55221369	SVA_41	A	0.4832	0.4734	0.3968	1	1.08	0.9033	1.292
chr7	56150058	56152554	SVA_42	A	0.3164	0.2966	0.1933	1	1.136	0.9373	1.378
chr7	66392674	66395118	SVA_44	A	0.413	0.3824	0.05272	1	1.2	0.9979	1.443
chr7	101357987	101360515	SVA_46	A	0.4748	0.4642	0.4936	1	1.06	0.8967	1.254
chr7	138611712	138612464	SVA_47	P	0.3301	0.3245	0.3246	1	1.1	0.9098	1.331
chr7	152584619	152587221	SVA_49	P	0.466	0.4627	0.9404	1	0.9933	0.8324	1.185
chr9	33423379	33424657	SVA_51	A	0.2158	0.2453	0.02744	1	0.7952	0.6486	0.9748
chr9	81709449	81712012	SVA_52	P	0.2078	0.1863	0.07607	1	1.227	0.9788	1.537
chr9	88244082	88246049	SVA_53	P	0.0994	0.07919	0.2389	1	1.211	0.8806	1.665
chr9	107255996	107258568	SVA_54	A	0.2737	0.2873	0.8015	1	0.9752	0.8015	1.186
chr9	107775255	107778315	SVA_56	P	0.2374	0.2531	0.4679	1	0.926	0.7524	1.14
chr10	6055424	6055906	SVA_57	P	0.07097	0.08627	0.5149	1	0.8946	0.6397	1.251
chr10	12518475	12520975	SVA_58	P	0.4621	0.472	0.5551	1	0.9488	0.7969	1.13
chr10	31968968	31971683	SVA_59	P	0.4487	0.4782	0.177	1	0.8848	0.7408	1.057
chr10	82478235	82478710	SVA_60	P	0.3075	0.3352	0.516	1	0.9348	0.7626	1.146
chr11	93946079	93948258	SVA_63	A	0.4088	0.4239	0.4771	1	0.9357	0.779	1.124
chr12	48331699	48334598	SVA_65	A	0.3381	0.3634	0.1213	1	0.865	0.72	1.039
chr12	66133872	66136096	SVA_66	A	0.441	0.4239	0.5234	1	1.06	0.8869	1.266
chr12	70201088	70203797	SVA_67	P	0.325	0.3137	0.4182	1	1.083	0.8933	1.312
chr12	95839815	95842550	SVA_68	P	0.1985	0.1838	0.5457	1	1.071	0.8566	1.34
chr12	95946567	95949177	SVA_69	P	0.4261	0.4391	0.6196	1	0.9562	0.8014	1.141
chr14	35038510	35040302	SVA_71	A	0.1617	0.1801	0.4386	1	0.9119	0.722	1.152
chr17	18887843	18888851	SVA_75	P	0.4345	0.4317	0.8382	1	1.019	0.8527	1.217
chr17	46237517	46238226	SVA_77	A	0.2109	0.2326	0.1551	1	0.8597	0.698	1.059
chr17	66268940	66269997	SVA_78	A	0.241	0.2383	0.8415	1	0.9789	0.7939	1.207
chr17	80601573	80602471	SVA_79	A	0.4086	0.4424	0.1074	1	0.8635	0.7222	1.032
chr18	54342407	54344600	SVA_80	A	0.05463	0.06677	0.473	1	0.8755	0.609	1.259
chr19	21720248	21722766	SVA_81	A	0.4422	0.4641	0.3138	1	0.913	0.7649	1.09
chr19	40107200	40109854	SVA_82	A	0.1862	0.1484	0.01185	0.7705	1.372	1.072	1.754
chr19	40647368	40650100	SVA_84	A	0.1303	0.1297	0.7865	1	0.9644	0.7417	1.254
chr19	41102822	41104285	SVA_85	A	0.1199	0.1304	0.8855	1	1.02	0.7744	1.345
chr19	52592771	52594356	SVA_86	A	0.4389	0.4146	0.1599	1	1.136	0.9511	1.356
chr20	32723075	32724969	SVA_88	P	0.2343	0.2391	0.7588	1	0.9678	0.7855	1.192
chr22	23853746	23856319	SVA_90	P	0.2714	0.2695	0.8621	1	0.9805	0.7849	1.225
chr22	23936390	23937906	SVA_91	P	0.322	0.3528	0.3999	1	0.9251	0.7717	1.109
chr22	24316866	24317521	SVA_92	A	0.2227	0.2196	0.9958	1	0.9994	0.8003	1.248
chr22	26772103	26773830	SVA_93	P	0.3745	0.382	0.5287	1	0.9443	0.7902	1.129
chr22	40744123	40746631	SVA_94	A	0.2072	0.1739	0.1176	1	1.201	0.9547	1.512

## Sheet:  Table S4
Table S4. Primers for validation of SVA exonisation events and genotyping of CASP8 SVA.
Target	For primer	Rev Primer
UGGT2 transcript exon 17-18	TCCTTTGCCTCAAGCTCTTT	ATTGCATTCGTGCGATCAT
MYO5A transcript exon 1-3	CTGCGTCGGAGCTCTACA	CTGAGGGCTGTGAGGTCATT
MYO5A transcript SVA-exon 3	GGAGGTGAGGAGCGTCTCT	CTGAGGGCTGTGAGGTCATT
MYO5A transcript exon 1-SVA	CTGCGTCGGAGCTCTACA	CACCTCCTAGACGGGATGAC
SLC25A12 transcript exon 3-4	TTGTTCAGCGCTATCTTGGA	TGAACATGGAATCTGGAGCA
SLC25A12 transcript SVA-exon 4	CTGCCCAGTCTGGAAAGTG	TGAACATGGAATCTGGAGCA
SLC25A12 transcript exon 3-SVA	TTGTTCAGCGCTATCTTGGA	CCTCACGTCCCAGACGAT
CASP8 transcript exon 6-8	TGGAACACACTTGGATGCAG	TTCCCCATGTTTTTCTTGTCA
CASP8 SVA Empty Site (absent allele)	AAGCCTGCAGAATCCAGCTA	ATCGTGGGGCTTGATCTCAA
CASP8 SVA 3' junction (present allele)	AAGCCTGCAGAATCCAGCTA	TGTTTATCTGCTGACCTTCCC
